# Supplementary material
Source: MDPI journal article supplement (https://www.mdpi.com/2073-4352/12/8/1065)
Supplement: s1 [file s1]

**Table S1.** Properties of Al reproduced by different interatomic potentials: lattice constant  $a_0$  and  $c_0$ , cohesive energy  $E_c$ , bulk modulus  $B_0$ , elastic constants  $C_{ij}$  and melting point  $T_m$ . The symbol of  $ab$  indicates that the data is calculated by first principle calculations in this work.

|        |                | Exp                  | Y22    | P15 [65] | W09 [66]  | Z09 [67]  | M08 [68] | L04 [69]  | Z04 [70]  | L03 [71] | Z03 [72]  | S00 [73] |
|--------|----------------|----------------------|--------|----------|-----------|-----------|----------|-----------|-----------|----------|-----------|----------|
|        |                |                      | eam/fs | meam     | eam/alloy | eam/alloy | eam/fs   | eam/alloy | eam/alloy | meam     | eam/alloy | eam/fs   |
| fcc-Al | $a_0$ (Å)      | 4.0496 [33]          | 4.0497 | 4.0500   | 4.0248    | 4.0320    | 4.0453   | 4.0320    | 4.0502    | 4.0447   | 4.0500    | 4.0500   |
|        | $E_c$ (eV)     | 3.3900 [34]          | 3.3896 | 3.3600   | 2.6460    | 3.3607    | 3.4107   | 3.3600    | 3.5800    | 3.3600   | 3.3600    | 3.3900   |
|        | $B_0$ (GPa)    | 72.2 [34]            | 72.2   | 78.9     | 79.1      | 81.6      | 74.7     | 81.6      | 76.0      | 79.4     | 79.0      | 77.0     |
|        | $C_{11}$ (GPa) | 106.8 [33]           | 83.1   | 96.9     | 113.8     | 105.1     | 105.1    | 118.9     | 107.0     | 114.3    | 116.8     | 94.6     |
|        | $C_{12}$ (GPa) | 60.4 [33]            | 66.7   | 69.9     | 61.7      | 69.8      | 59.5     | 62.9      | 60.5      | 61.9     | 60.1      | 68.2     |
|        | $C_{44}$ (GPa) | 28.3 [33]            | 29.1   | 31.3     | 31.2      | 44.1      | 30.7     | 33.0      | 28.3      | 31.6     | 31.7      | 42.5     |
|        | $T_m$ (K)      | 933.5 [75]           | 740±1  | 794±1    | 823±1     | 930±1     | 908±1    | 845±1     | 566±1     | 913±1    | 849±1     | 908±1    |
| bcc-Al | $a_0$ (Å)      | 3.2347 <sup>ab</sup> | 3.2151 | 3.3193   | 3.2238    | 3.1957    | 3.2384   | 3.1305    | 3.3100    | 3.2269   | 3.2355    | 3.2081   |
|        | $E_c$ (eV)     | 3.2929 <sup>ab</sup> | 3.3748 | 3.2778   | 2.5165    | 3.3256    | 3.3088   | 3.2758    | 3.5463    | 3.2417   | 3.2674    | 3.3558   |
|        | $B_0$ (GPa)    | 68.4 <sup>ab</sup>   | 70.7   | 47.6     | 39.2      | 76.4      | 39.3     | 94.6      | 72.3      | 75.4     | 52.9      | 67.5     |
|        | $C_{11}$ (GPa) | 41.3 <sup>ab</sup>   | 70.6   | -10.5    | -8.2      | 70.9      | 12.9     | 120.7     | 71.4      | 26.0     | 20.9      | 54.4     |
|        | $C_{12}$ (GPa) | 81.9 <sup>ab</sup>   | 70.8   | 76.7     | 62.9      | 79.2      | 52.5     | 81.6      | 72.8      | 100.2    | 68.9      | 74.0     |

|        |                   |                      |        |        |        |        |        |        |        |        |        |        |
|--------|-------------------|----------------------|--------|--------|--------|--------|--------|--------|--------|--------|--------|--------|
|        | $C_{44}$<br>(GPa) | 41.3 <sup>ab</sup>   | 33.2   | 13.7   | 27.6   | 53.2   | 18.8   | 67.1   | 30.0   | 31.2   | 38.0   | 47.3   |
|        | $a_0$ (Å)         | 2.8514 <sup>ab</sup> | 2.8495 | 2.8348 | 2.8252 | 2.8490 | 2.8451 | 2.8220 | 2.8312 | 2.8326 | 2.8357 | 2.8631 |
|        | $c_0$ (Å)         | 4.7273 <sup>ab</sup> | 4.7241 | 4.8186 | 4.7479 | 4.6550 | 4.7462 | 4.8931 | 4.8933 | 4.7946 | 4.8983 | 4.6805 |
|        | $E_c$ (eV)        | 3.3570 <sup>ab</sup> | 3.3890 | 3.3291 | 2.6159 | 3.3572 | 3.3831 | 3.3363 | 3.5788 | 3.3305 | 3.3384 | 3.3853 |
|        | $B_0$ (GPa)       | 74.4 <sup>ab</sup>   | 72.0   | 72.0   | 64.9   | 79.6   | 69.3   | 85.4   | 82.9   | 77.9   | 72.3   | 72.2   |
| hcp-Al | $C_{11}$<br>(GPa) | 106.1 <sup>ab</sup>  | 97.6   | 117.4  | 98.7   | 125.5  | 117.2  | 146.2  | 131.4  | 128.8  | 116.9  | 114.4  |
|        | $C_{12}$<br>(GPa) | 67.8 <sup>ab</sup>   | 66.2   | 49.3   | 48.0   | 68.0   | 60.4   | 72.0   | 71.4   | 60.0   | 60.9   | 66.5   |
|        | $C_{44}$<br>(GPa) | 6.5 <sup>ab</sup>    | 15.0   | 21.1   | 17.3   | 24.2   | 12.8   | 19.3   | 16.2   | 26.8   | 13.4   | 18.2   |

**Table S2.** Properties of Ni reproduced by different interatomic potentials.

|        |                | Exp or cal           | Y22    | E18 [76] | S16 [77]  | A15 [78] | M12 [79] | Z04 [80]  | L03 [81] |
|--------|----------------|----------------------|--------|----------|-----------|----------|----------|-----------|----------|
|        |                |                      | eam/fs | meam     | eam/alloy | meam     | eam/fs   | eam/alloy | meam     |
| fcc-Ni | $a_0$ (Å)      | 3.5240 [34]          | 3.5229 | 3.5214   | 3.5200    | 3.5214   | 3.5181   | 3.5197    | 3.5214   |
|        | $E_c$ (eV)     | 4.4400 [74]          | 4.4385 | 4.4500   | 4.4500    | 4.4500   | 4.3855   | 4.4500    | 4.4500   |
|        | $B_0$ (GPa)    | 186.0 [74]           | 189.6  | 187.6    | 180.6     | 187.6    | 180.5    | 180.6     | 187.6    |
|        | $C_{11}$ (GPa) | 248.1 [34]           | 242.5  | 270.8    | 240.9     | 261.7    | 247.0    | 247.0     | 261.2    |
|        | $C_{12}$ (GPa) | 154.9 [34]           | 163.1  | 146.0    | 150.5     | 150.5    | 147.3    | 147.3     | 150.8    |
|        | $C_{44}$ (GPa) | 124.2 [34]           | 123.4  | 132.5    | 127.1     | 131.7    | 122.8    | 124.9     | 131.7    |
|        | $T_m$ (K)      | 1728.3 [75]          | 1753±1 | 2064±1   | 1636±1    | 1984±1   | 1709±1   | 1480±1    | 2164±1   |
| bcc-Ni | $a_0$ (Å)      | 2.7893 <sup>ab</sup> | 2.8052 | 2.80676  | 2.7687    | 2.7868   | 2.7570   | 2.8061    | 2.7945   |
|        | $E_c$ (eV)     | 4.3873 <sup>ab</sup> | 4.3912 | 4.37218  | 4.3827    | 4.2786   | 4.2945   | 4.3671    | 4.2893   |
|        | $B_0$ (GPa)    | 200.9 <sup>ab</sup>  | 177.4  | 245.1    | 148.9     | 184.3    | 93.5     | 89.1      | 181.0    |
|        | $C_{11}$ (GPa) | 178.5 <sup>ab</sup>  | 162.7  | 282.8    | 141.9     | 89.0     | 100.3    | 40.6      | 89.0     |
|        | $C_{12}$ (GPa) | 212.0 <sup>ab</sup>  | 184.8  | 226.2    | 152.5     | 231.9    | 90.0     | 113.4     | 227.0    |
|        | $C_{44}$ (GPa) | 147.6 <sup>ab</sup>  | 121.0  | 229.1    | 127.3     | 156.4    | 83.1     | 91.8      | 158.5    |
| hcp-Ni | $a_0$ (Å)      | 2.4713 <sup>ab</sup> | 2.4835 | 2.48607  | 2.4819    | 2.4844   | 2.4859   | 2.4829    | 2.4844   |
|        | $c_0$ (Å)      | 4.0915 <sup>ab</sup> | 4.0928 | 4.08227  | 4.1048    | 4.0914   | 4.1204   | 4.1168    | 4.0914   |
|        | $E_c$ (eV)     | 4.4141 <sup>ab</sup> | 4.4379 | 4.43858  | 4.4279    | 4.4293   | 4.3534   | 4.4339    | 4.4293   |
|        | $B_0$ (GPa)    | 203.2 <sup>ab</sup>  | 189.6  | 187.0    | 159.4     | 186.5    | 136.8    | 159.8     | 186.4    |
|        | $C_{11}$ (GPa) | 300.5 <sup>ab</sup>  | 303.1  | 329.1    | 298.5     | 332.0    | 267.0    | 302.6     | 332.7    |
|        | $C_{12}$ (GPa) | 180.1 <sup>ab</sup>  | 158.4  | 140.1    | 145.2     | 138.4    | 134.2    | 138.1     | 139.0    |
|        | $C_{44}$ (GPa) | 48.9 <sup>ab</sup>   | 67.6   | 76.6     | 48.6      | 75.7     | 39.0     | 55.6      | 75.0     |

**Table S3.** Properties of Ti reproduced by different interatomic potentials.

|        |                | Exp or cal           | Y22    | M16_1 [82] | M16_2 [83] | M16_3 [83] | H08 [84]    | K06 [85] | Z04 [70]  |
|--------|----------------|----------------------|--------|------------|------------|------------|-------------|----------|-----------|
|        |                |                      | eam/fs | eam/fs     | eam/fs     | eam/fs     | meam/spline | meam     | eam/alloy |
| hcp-Ti | $a_0$ (Å)      | 2.9506 [34]          | 2.9494 | 2.9465     | 2.9487     | 2.9507     | 2.9305      | 2.9453   | 2.9405    |
|        | $c_0$ (Å)      | 4.6835 [34]          | 4.6816 | 4.7043     | 4.6983     | 4.6879     | 4.6783      | 4.6874   | 4.7721    |
|        | $E_c$ (eV)     | 4.8500 [74]          | 4.8456 | 5.3455     | 5.2465     | 5.4017     | 4.8312      | 4.8727   | 4.8700    |
|        | $B_0$ (GPa)    | 105.1 [74]           | 106.4  | 110.5      | 100.4      | 111.2      | 112.8       | 109.7    | 105.9     |
|        | $C_{11}$ (GPa) | 162.4 [74]           | 131.2  | 160.8      | 160.2      | 164.8      | 174.2       | 170.0    | 148.5     |
|        | $C_{12}$ (GPa) | 92.0 [34]            | 94.0   | 80.3       | 69.6       | 87.8       | 94.7        | 80.4     | 88.4      |
|        | $C_{44}$ (GPa) | 46.7 [34]            | 61.9   | 52.6       | 54.3       | 57.7       | 57.7        | 42.1     | 36.8      |
|        | $T_m$ (K)      | 1941.0 [75]          | 1552±1 | 1750±1     | 1233±1     | 1200±10    | 1803±1      | 1638±1   | 1480±1    |
| bcc-Ti | $a_0$ (Å)      | 3.2455 <sup>ab</sup> | 3.2822 | 3.2513     | 3.2563     | 3.2422     | 3.2716      | 3.2661   | 3.2919    |
|        | $E_c$ (eV)     | 4.7379 <sup>ab</sup> | 4.8150 | 5.3162     | 5.1726     | 5.3130     | 4.7201      | 4.8489   | 4.8502    |
|        | $B_0$ (GPa)    | 109.6 <sup>ab</sup>  | 102.1  | 307.6      | 414.7      | 255.2      | 105.6       | 113.9    | 112.9     |
|        | $C_{11}$ (GPa) | 98.6 <sup>ab</sup>   | 81.8   | 308.8      | 394.2      | 236.6      | 94.9        | 129.7    | 120.4     |
|        | $C_{12}$ (GPa) | 115.0 <sup>ab</sup>  | 112.2  | 306.9      | 425.0      | 264.5      | 111.0       | 105.9    | 109.2     |
|        | $C_{44}$ (GPa) | 45.4 <sup>ab</sup>   | 97.8   | 28.6       | 21.9       | 33.9       | 52.9        | 78.1     | 77.3      |
| fcc-Ti | $a_0$ (Å)      | 4.0972 <sup>ab</sup> | 4.1313 | 4.1820     | 4.2133     | 4.1313     | 4.1467      | 4.1330   | 4.1491    |
|        | $E_c$ (eV)     | 4.7919 <sup>ab</sup> | 4.8484 | 5.2867     | 5.1947     | 5.3488     | 4.7925      | 4.8245   | 4.8637    |
|        | $B_0$ (GPa)    | 111.5 <sup>ab</sup>  | 106.2  | 6.5        | 78.7       | 95.4       | 97.6        | 108.6    | -1444.7   |
|        | $C_{11}$ (GPa) | 140.0 <sup>ab</sup>  | 169.8  | 106.8      | 121.4      | 91.4       | 125.8       | 148.4    | -6846.5   |
|        | $C_{12}$ (GPa) | 97.2 <sup>ab</sup>   | 74.5   | -43.7      | 57.3       | 97.4       | 83.5        | 88.7     | -161.0    |
|        | $C_{44}$ (GPa) | 59.2 <sup>ab</sup>   | 33.8   | 43.6       | 62.5       | 60.1       | 58.7        | 62.6     | 57.3      |

**Table S4.** Properties of Al-Ni reproduced by different interatomic potentials.

|                                      |             | Exp or Cal           | Y22    | M22<br>[83] | P09 [84]  | S07<br>[85] | M04 [86]  | M02 [35]  |
|--------------------------------------|-------------|----------------------|--------|-------------|-----------|-------------|-----------|-----------|
|                                      |             |                      | eam/fs | meam        | eam/alloy | meam        | eam/alloy | eam/alloy |
| D0 <sub>11</sub> -Al <sub>3</sub> Ni | $a_0$ (Å)   | 6.598 [87]           | 6.559  | 7.089       | 6.645     | 6.622       | 6.665     | 6.625     |
|                                      | $b_0$ (Å)   | 7.352 [87]           | 7.307  | 7.898       | 7.403     | 7.378       | 7.426     | 7.381     |
|                                      | $c_0$ (Å)   | 4.801 [87]           | 4.772  | 5.158       | 4.835     | 4.818       | 4.850     | 4.820     |
|                                      | $E_f$ (eV)  | -0.421 <sup>ab</sup> | -0.428 | 0.234       | -0.239    | -0.255      | -0.241    | -0.265    |
|                                      | $B_0$ (GPa) | 113.1 <sup>ab</sup>  | 92.6   | 79.534      | 119.3     | 101.6       | 115.8     | 117.7     |
| B2-AlNi                              | $a_0$ (Å)   | 2.880 [37]           | 2.842  | 3.170       | 2.832     | 2.877       | 2.862     | 2.859     |
|                                      | $E_f$ (eV)  | -0.688 <sup>ab</sup> | -0.683 | 0.266       | -0.606    | -0.626      | -0.590    | -0.533    |
|                                      | $B_0$ (GPa) | 160.4 <sup>ab</sup>  | 160.2  | 127.9       | 158.9     | 158.0       | 236.7     | 159.7     |
| L1 <sub>2</sub> -AlNi <sub>3</sub>   | $a_0$ (Å)   | 3.572 [88]           | 3.510  | 3.829       | 3.533     | 3.570       | 3.571     | 3.526     |
|                                      | $E_f$ (eV)  | -0.469 <sup>ab</sup> | -0.506 | 0.151       | -0.454    | -0.437      | -0.448    | -0.383    |
|                                      | $B_0$ (GPa) | 183.0 <sup>ab</sup>  | 191.7  | 162.2       | 190.3     | 181.9       | 181.5     | 247.3     |

**Table S5.** Properties of Al-Ti reproduced by different interatomic potentials.

|                                      |             | Exp or Cal  | Y22    | K16 [38] | Z03 [72]  |
|--------------------------------------|-------------|-------------|--------|----------|-----------|
|                                      |             |             | eam/fs | meam     | eam/alloy |
| D0 <sub>22</sub> -Al <sub>3</sub> Ti | $a_0$ (Å)   | 3.854 [39]  | 3.855  | 3.897    | 3.929     |
|                                      | $c_0$ (Å)   | 8.584 [39]  | 8.586  | 8.681    | 8.752     |
|                                      | $E_f$ (eV)  | -0.379 [40] | -0.361 | -0.284   | -0.263    |
|                                      | $B_0$ (GPa) | 103.0 [47]  | 116.0  | 126.8    | 114.7     |
| L1 <sub>0</sub> -AlTi                | $a_0$ (Å)   | 2.832 [90]  | 2.821  | 2.846    | 2.856     |
|                                      | $c_0$ (Å)   | 4.070 [90]  | 4.054  | 4.090    | 4.105     |
|                                      | $E_f$ (eV)  | -0.416 [40] | -0.406 | -0.386   | -0.401    |
|                                      | $B_0$ (GPa) | 112.1 [89]  | 136.8  | 142.7    | 141.7     |
| D0 <sub>19</sub> -AlTi <sub>3</sub>  | $a_0$ (Å)   | 5.780 [49]  | 5.765  | 5.799    | 5.827     |
|                                      | $c_0$ (Å)   | 4.647 [49]  | 4.635  | 4.663    | 4.685     |
|                                      | $E_f$ (eV)  | -0.259 [40] | -0.292 | -0.281   | -0.287    |
|                                      | $B_0$ (GPa) | 111.9 [89]  | 112.1  | 135.6    | 122.1     |

**Table S6.** Properties of Ni-Ti reproduced by different interatomic potentials.

|                                 |             | Exp or Cal  | Y22    | K19 [90] | K17 [49] | K15 [41] |
|---------------------------------|-------------|-------------|--------|----------|----------|----------|
|                                 |             |             | eam/fs | meam     | meam     | meam     |
| <i>hP16</i> -Ni <sub>3</sub> Ti | $a_0$ (Å)   | 5.096 [45]  | 5.103  | 5.177    | 5.091    | 5.165    |
|                                 | $c_0$ (Å)   | 8.304 [45]  | 8.315  | 8.436    | 8.295    | 8.416    |
|                                 | $E_f$ (eV)  | -0.360 [48] | -0.381 | -0.275   | -0.329   | -0.329   |
|                                 | $B_0$ (GPa) | 163.4 [42]  | 130.8  | 157.5    | 166.9    | 152.2    |
| B2-NiTi                         | $a_0$ (Å)   | 3.007 [46]  | 2.962  | 3.017    | 2.968    | 3.011    |
|                                 | $E_f$ (eV)  | -0.351 [43] | -0.358 | -0.342   | -0.351   | -0.357   |
|                                 | $B_0$ (GPa) | 142.0 [48]  | 123.4  | 137.3    | 142.0    | 129.0    |
| <i>cF96</i> -NiTi <sub>2</sub>  | $a_0$ (Å)   | 11.278 [50] | 11.310 | 11.260   | 11.204   | 11.249   |
|                                 | $E_f$ (eV)  | -0.278 [48] | -0.312 | -0.278   | -0.264   | -0.300   |
|                                 | $B_0$ (GPa) | 119.8 [41]  | 83.4   | 124.4    | 126.3    | 116.1    |

**Table S7.** Properties of Al-Ni-Ti reproduced by different interatomic potentials.

|                                                                |             | Exp or Cal  | Y22    | K17 [35] |
|----------------------------------------------------------------|-------------|-------------|--------|----------|
|                                                                |             | eam/fs      | meam   | eam/fs   |
| <i>cF16</i> -AlNi <sub>2</sub> Ti                              | $a_0$ (Å)   | 5.889 [43]  | 5.821  | 6.22334  |
|                                                                | $E_f$ (eV)  | -0.620 [43] | -0.529 | 0.0492   |
|                                                                | $B_0$ (GPa) | 162.0 [43]  | 148.8  | 168.684  |
| <i>cF116</i> -Al <sub>16</sub> Ni <sub>7</sub> Ti <sub>6</sub> | $a_0$ (Å)   | 11.802 [44] | 12.086 | 11.4433  |
|                                                                | $E_f$ (eV)  | -0.560 [44] | -0.497 | -0.8633  |
|                                                                | $B_0$ (GPa) | 130.0 [44]  | 78.7   | 139.379  |

## References

- 65 Pascuet, M.I.; Fernández, J.R. Atomic interaction of the MEAM type for the study of intermetallics in the Al–U alloy. *Journal Nucl. Mater.* **2015**, *467*, 229–239.
- 66 Winey, J.M.; Kubota, A.; Gupta, Y.M. Thermodynamic approach to determine accurate potentials for molecular dynamics simulations: thermoelastic response of aluminum. *Model. Simul. Mater. Sci. Eng.* **2010**, *18*, 055004.
- 67 Zhakhovskii, V.V.; Inogamov, N.A.; Petrov, Yu. V.; Ashitkov, S.I. Nishihara, K. Molecular dynamics simulation of femtosecond ablation and spallation with different interatomic potentials. *Appl. Surf. Sci.* **2009**, *255*, 9592–9596.
- 68 Mendelev, M.I.; Kramer, M.J.; Becker, C.A.; Asta, M. Analysis of semi-empirical interatomic potentials appropriate for simulation of crystalline and liquid Al and Cu. *Philos. Mag.* **2008**, *88*, 1723–1750.
- 69 Liu, X.-Y.; Ercolessi, F.; Adams, J.B. Aluminium interatomic potential from density functional theory calculations with improved stacking fault energy. *Model. Simul. Mater. Sci. Eng.* **2004**, *12*, 665–670.
- 70 Zhou, X.W.; Johnson, R.A.; Wadley, H.N.G. Misfit-energy-increasing dislocations in vapor-deposited CoFe/NiFe multilayers. *Phys. Rev. B* **2004**, *69*, 144113.
- 71 Lee, B.-J.; Shim, J.-H.; Baskes, M.I. Semiempirical atomic potentials for the fcc metals Cu, Ag, Au, Ni, Pd, Pt, Al, and Pb based on first and second nearest-neighbor modified embedded atom method. *Phys. Rev. B* **2003**, *68*, 144112.
- 72 Zope, R.R.; Mishin, Y. Interatomic potentials for atomistic simulations of the Ti–Al system. *Phys. Rev. B* **2003**, *68*, 024102.
- 73 Sturgeon, J.B.; Laird, B.B. Adjusting the melting point of a model system via Gibbs–Duhem integration: Application to a model of aluminum. *Phys. Rev. B* **2000**, *62*, 14720.
- 74 Martienssen, W.; Warlimont, H. *Springer Handbook of Condensed Matter and Materials Data*. Springer: Berlin, Heidelberg, Germany, 2005.
- 75 Etesami, S.A. Asadi, E. Molecular dynamics for near melting temperatures simulations of metals using modified embedded-atom method. *J. Phys. Chem. Solids* **2018**, *112*, 61–72.
- 76 Stoller, R.E.; Tamm, A.; Béland, L.K.; Samolyuk, G.D.; Stocks, G.M.; Caro, A.; Slipchenko, L.V.; Osetsky, Y.N.; Aabloo, A.; Klintonberg, et al. Impact of Short-Range Forces on Defect Production from High-Energy Collisions. *J. Chem Theory Comput.* **2016**, *12*, 2871–2879.
- 77 Asadi, E.; Zaeem, M.A.; Nouranian, S.; Baskes, M.I. Two-phase solid–liquid coexistence of Ni, Cu, and Al by molecular dynamics simulations using the modified embedded-atom method. *Acta Mater.* **2015**, *86*, 169–181.
- 78 Mendelev, M.I.; Kramer, M.J.; Hao, S.G.; Ho, K.M. Wang, C.Z. Development of interatomic potentials appropriate for simulation of liquid and glass properties of NiZr<sub>2</sub> alloy. *Philos. Mag.* **2012**, *92*, 4454–4469.
- 79 Mendelev, M.I.; Underwood, T.L.; Ackland, G.J. Development of an interatomic potential for the simulation of defects, plasticity, and phase transformations in titanium. *J Chem. Phys.* **2016**, *145*, 154102.
- 80 Hennig, R.G.; Lenosky, T.J.; Trinkle, D.R.; Rudin, S.P.; Wilkins, J.W.; Classical potential describes martensitic phase transformations between the  $\alpha$ ,  $\beta$ , and  $\omega$  titanium phases. *Phys. Rev. B* **2008**, *78*, 054121.
- 81 Kim, Y.-M.; Lee, B.-J.; Baskes, M.I. Modified embedded-atom method interatomic potentials for Ti and Zr. *Phys. Rev. B* **2006**, *74*, 014101.
- 82 Mahata, A.; Mukhopadhyay, T.; Zaeem, M.A. Modified embedded-atom method interatomic potentials for Al–Cu, Al–Fe and Al–Ni binary alloys: From room temperature to melting point. *Comput. Mater. Sci.* **2022**, *201*, 110902.
- 83 Purja Pun, G.P.; Mishin, Y. Development of an interatomic potential for the Ni–Al system. *Philos. Mag.* **2009**, *89*, 3245–3267.
- 84 e Silva, A.C.; Ågren, J.; Clavaguera-Mora, M.T.; Djurovic, D.; Gomez-Acebo, T.; Lee, B.J.; Liu, Z.K.; Miodownik, P.; Seifert, H.J. Applications of computational thermodynamics—the extension from phase equilibrium to phase transformations and other properties. *Calphad* **2007**, *31*, 53–74.
- 85 Mishin, Y. Atomistic modeling of the  $\gamma$  and  $\gamma'$ -phases of the Ni–Al system. *Acta Mater.* **2004**, *52*, 1451–1467.
- 86 Mishin, Y.; Mehl, M.J.; Papaconstantopoulos, D.A. Embedded-atom potential for B<sub>2</sub>–NiAl. *Phys. Rev. B* **2002**, *65*, 224114.
- 87 Ageev, N.V.; Guseva, L.N. Experimental study of the electron density in crystals. In *Bulletin of the Academy of Sciences of the USSR Division of Chemical Science*, **1952**, *1*, 31–39.
- 88 Kim, Y.K.; Kim, H.K.; Jung, W.S.; Lee, B.J. Atomistic modeling of the Ti–Al binary system. *Comput. Mater. Sci.* **2016**, *119*, 1–8.

- 89 Kavousi, S.; Novak, B.R.; Baskes, M.I.; Zaeem, M.A.; Moldovan, D. Modified embedded-atom method potential for high-temperature crystal-melt properties of Ti–Ni alloys and its application to phase field simulation of solidification. *Model. Simul. Mater. Sci. Eng.* **2019**, *28*, 015006.
- 90 Kim, Y.K.; Kim, H.K.; Jung, W.S.; Lee, B.J. Development and application of Ni-Ti and Ni-Al-Ti 2NN-MEAM interatomic potentials for Ni-base superalloys. *Comput. Mater. Sci.* **2017**, *139*, 225–233.
